# Supplementary material
Source: PubMed Central journal article supplement (PMC7269157)

AF647  
*First Ab development*

AF546  
*Development after elution*

AF488  
*Second Ab development*

A: Heat

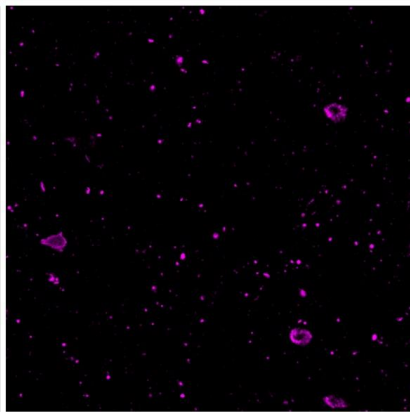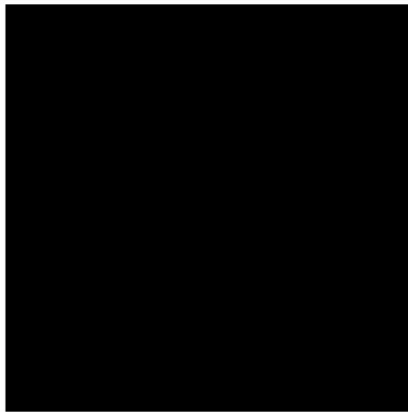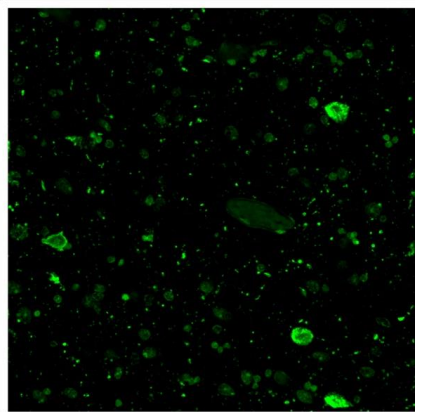

B: Glycine/SDS, pH 2.0

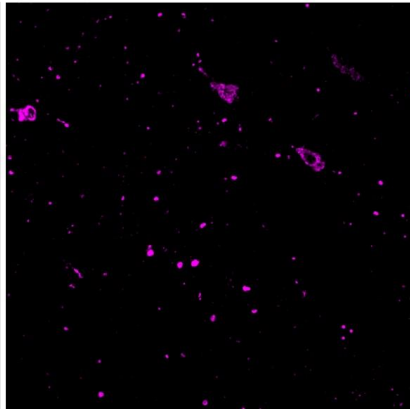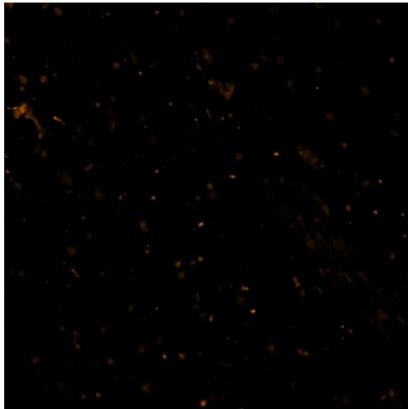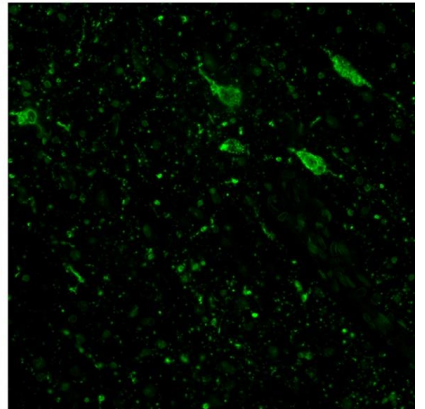

C: Denaturing solution

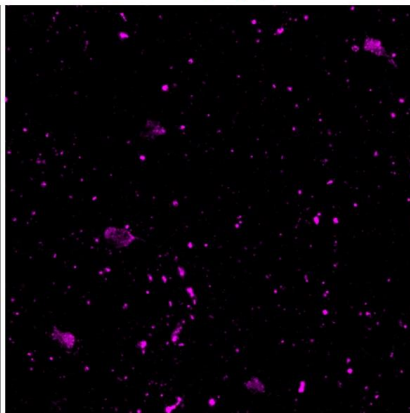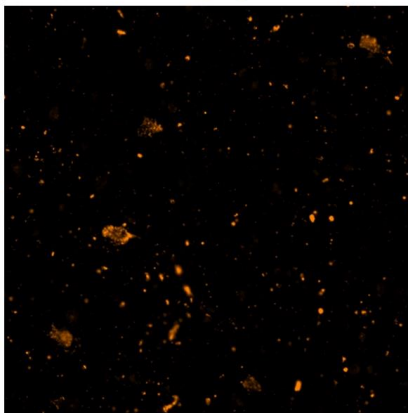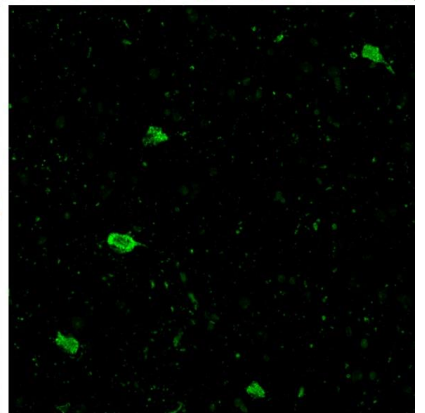

D:  $\beta$ -mercaptoethanol

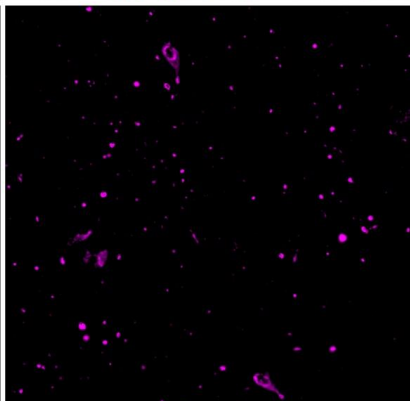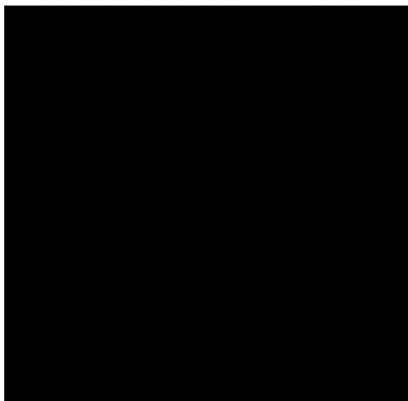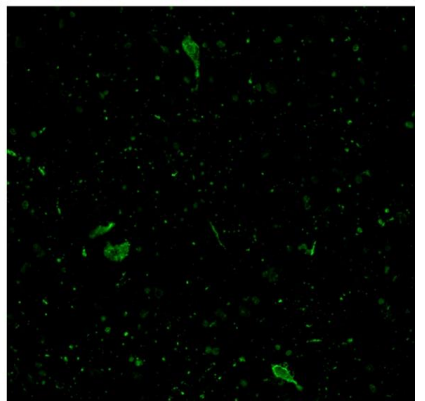

AF647  
*First Ab development*

AF546  
*Development after elution*

AF488  
*Second Ab development*

A: Heat

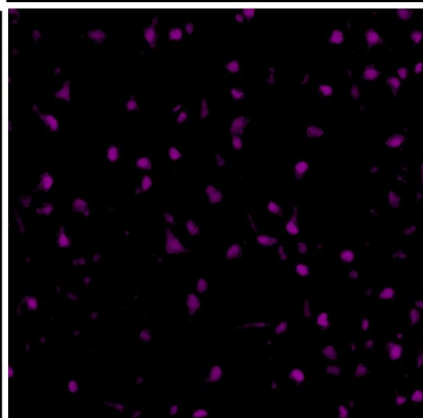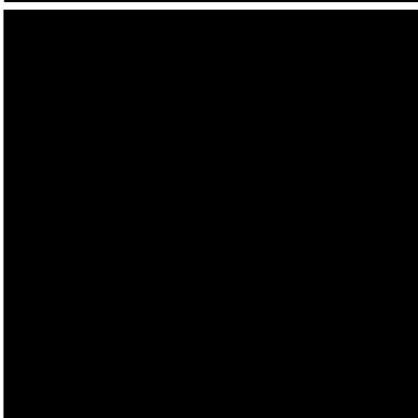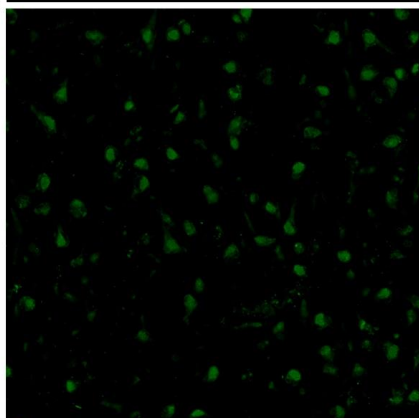

B: Glycine/SDS, pH 2.0

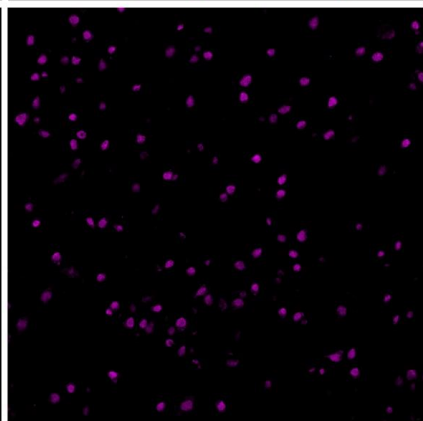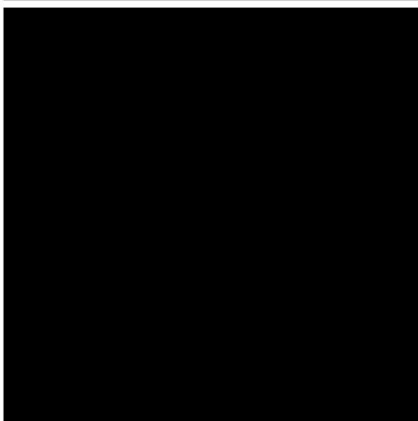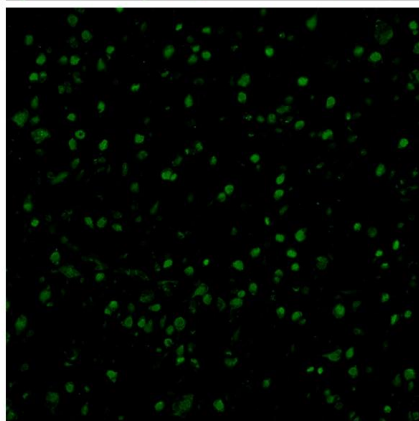

C: Denaturing solution

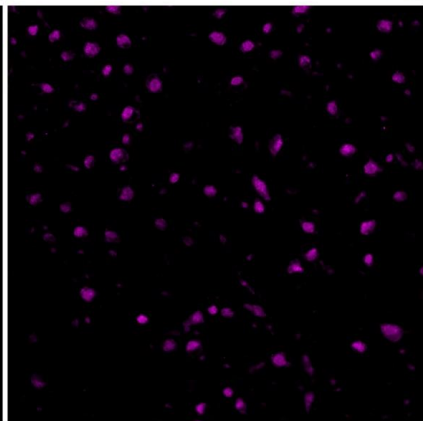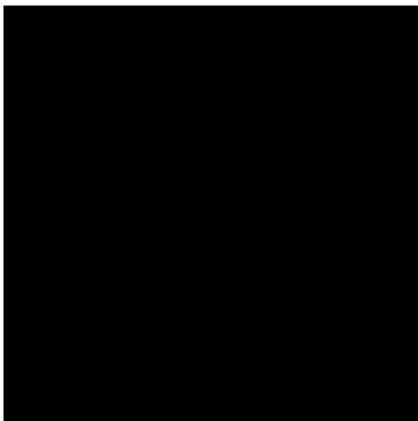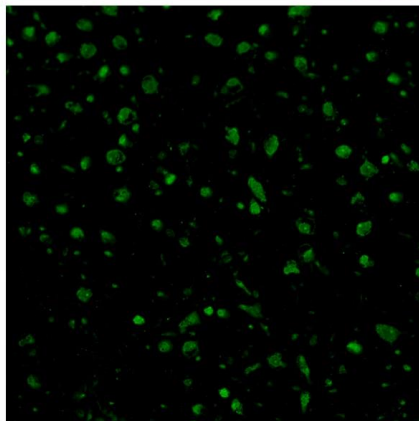

D:  $\beta$ -mercaptoethanol

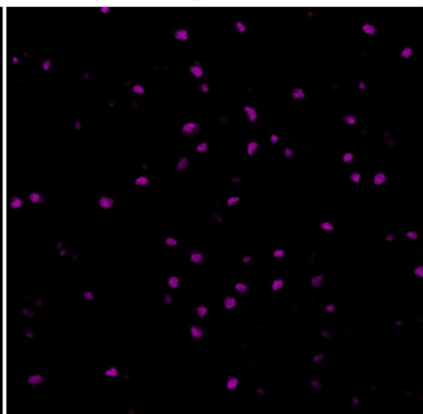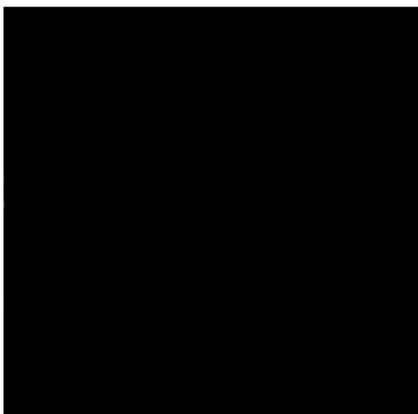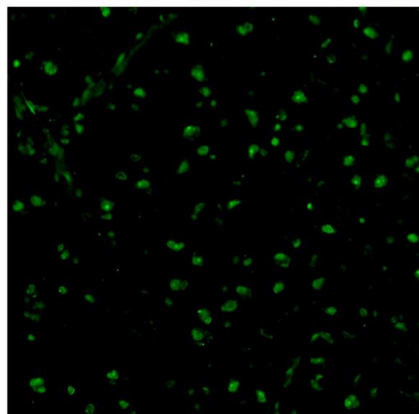

Supplement: NIHMS1585687-supplement-1.pdf [file NIHMS1585687-supplement-1.pdf]
